# Supplementary material
Source: HighWire-hosted journal article supplement (http://rc.rcjournal.com/highwire/filestream/25715/field_highwire_adjunct_files/1/rc-10803-File004.pdf)

Supplemental figure 1: ventilator mode block assignments

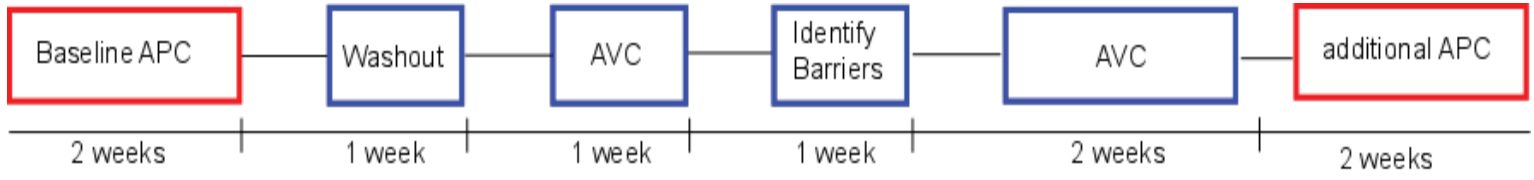

Supplement: rc-10803-File004.pdf [file rc-10803-File004.pdf]
